# Supplementary material
Source: Springer Nature journal article supplement (https://www.springermedizin.de/resource/supplementary/12883_2013_1156_MOESM5_ESM.pdf/9456000)

# TAP: NF1-Placebo vs. NF1-Lovastatin

□ NF1-Placebo  
■ NF1-Lovastatin

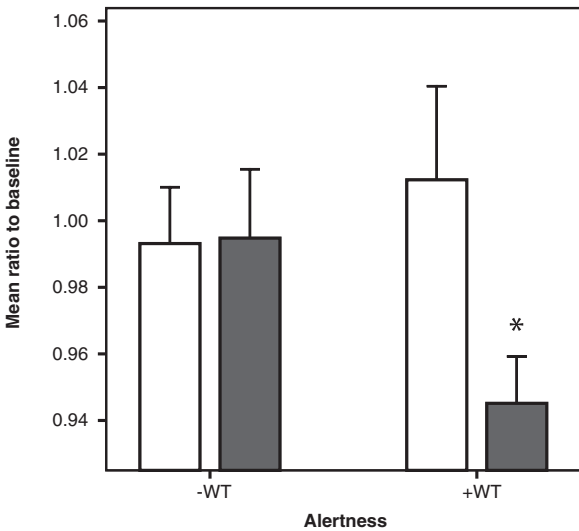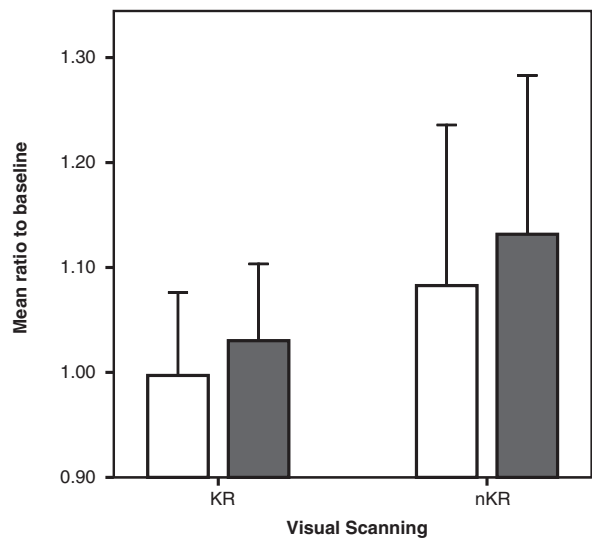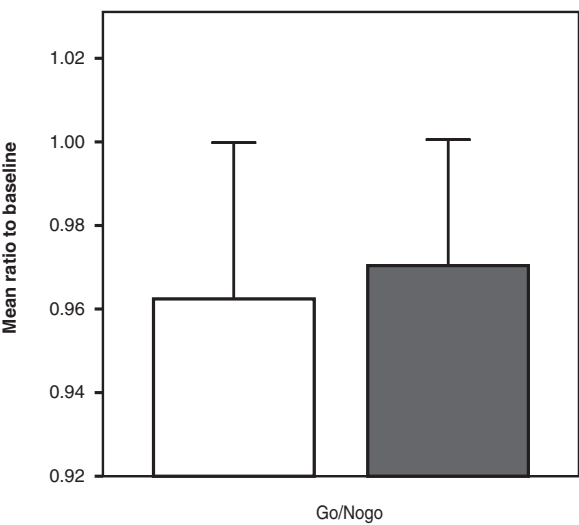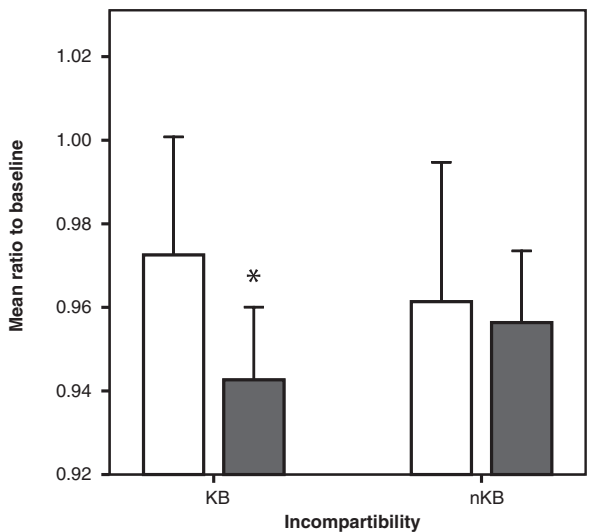

Supplement: MOESM5 [file 9456000]
